# Supplementary material
Source: publisher figshare collection journal article supplement (https://gsapubs.figshare.com/ndownloader/files/22759487)

**Table DR1.** Physical properties of Australasian microtektites from Core SO95-17957-2, South China Sea and their mineral inclusions as detected by synchrotron X-ray diffraction and microanalytical FEG-SEM.

| <i>sample</i> | <i>shape</i>       | <i>color</i> | <i>transparency</i> | <i>vesicles</i> | <i>size</i> | <i>mineral inclusions</i> <sup>†</sup> | <i>main diffraction features</i>                    |
|---------------|--------------------|--------------|---------------------|-----------------|-------------|----------------------------------------|-----------------------------------------------------|
| 1             | sphere             | pale yellow  | transparent         |                 | 515         | qtz                                    | few streaked spots along a qtz ideal ring           |
| 2             | prolate ellipsoid  | pale yellow  | transparent         | abundant        | 625 x 475   | -                                      | no diffraction features                             |
| 4             | truncate dumbbell  | pale brown   | transparent         | abundant        | 740 x 400   | qtz, ox                                | few streaked spots along a qtz ideal ring           |
| 5             | sphere             | brown        | transparent         | abundant        | 550         | qtz, ox                                | fairly continuous qtz rings with streaked spots     |
| 8             | brocken sphere     | pale brown   | translucent         | abundant        | 459         | qtz, ox, zr                            | fairly continuous qtz rings with few streaked spots |
| 10            | sphere             | brown        | translucent         | abundant        | 370         | qtz, ox                                | fairly continuous qtz rings with streaked spots     |
| 11            | sphere             | pale brown   | translucent         | abundant        | 343         | qtz                                    | few streaked spots along an ideal qtz ring          |
| 12            | prolate ellipsoid  | brown        | translucent         | abundant        | 591 x 495   | qtz, ox                                | few streaked spots along an ideal qtz ring          |
| 13            | truncated dumbbell | pale brown   | translucent         |                 | 620 x 350   | qtz, ox                                | fairly continuous qtz rings without spots           |
| 14            | angular            | pale brown   | transparent         | abundant        | 583 x 482   | qtz, ox                                | fairly continuous qtz rings with few streaked spots |
| 16            | truncated teardrop | brown        | translucent         | abundant        | 370 x 250   | qtz, ox                                | fairly continuous qtz rings without spots           |
| 17            | angular            | pale yellow  | translucent         |                 | 596 x 461   | -                                      | no diffraction features                             |
| 19            | brocken sphere     | brown        | translucent         |                 | 635         | qtz, ox                                | few streaked spots along an ideal qtz ring          |
| 21            | dumbbell           | pale yellow  | transparent         | abundant        | 719 x 401   | -                                      | no diffraction features                             |
| 24            | sphere             | brown        | transparent         |                 | 410         | qtz, ox                                | few streaked spots along an ideal qtz ring          |

<sup>†</sup> Only quartz was identified by X-ray diffraction; note, however, that microtektite #12 shows also a diffraction peak at  $d = 4.05 \text{ \AA}$ , close to the strongest diffraction peak of cristobalite (PDF 39-1425), with  $d = 4.04 \text{ \AA}$ . Abbreviations: qtz = quartz; ox = Fe-oxide; zr = unidentified zr-phase.

**Table DR2.** Bulk composition of normal Australasian microtektites from Core SO95-17957-2 (South China Sea), obtained by averaging three 20 x 20  $\mu\text{m}$  raster EPMA of sectioned microtektites. Compositions are listed in order of increasing silica content. Bulk composition of representative lechatelierite and quartz inclusions, and Al-rich glass domains observed in some microtektites are also reported. Detection limits (wt%) for the analyzed oxides are as follows:  $\text{Na}_2\text{O} = 0.05$ ,  $\text{MgO} = 0.02$ ,  $\text{Al}_2\text{O}_3 = 0.09$ ,  $\text{SiO}_2 = 0.06$ ,  $\text{K}_2\text{O} = 0.06$ ,  $\text{CaO} = 0.06$ ,  $\text{TiO}_2 = 0.09$ ,  $\text{Cr}_2\text{O}_3 = 0.19$ ,  $\text{MnO} = 0.12$ ,  $\text{FeO} = 0.16$ ;  $\text{NiO} = 0.19$ ;  $\text{Cl} = 0.7$ ).  $\text{Cr}_2\text{O}_3$  and  $\text{NiO}$  were always below detection limits.

| <i>sample</i>                    | <i>mount</i> | <i>SiO<sub>2</sub></i> | <i>TiO<sub>2</sub></i> | <i>Al<sub>2</sub>O<sub>3</sub></i> | <i>FeO</i> <sup>^</sup> | <i>MnO</i> | <i>MgO</i> | <i>CaO</i> | <i>Na<sub>2</sub>O</i> | <i>K<sub>2</sub>O</i> | <i>total</i> |
|----------------------------------|--------------|------------------------|------------------------|------------------------------------|-------------------------|------------|------------|------------|------------------------|-----------------------|--------------|
| <b>microtektites</b>             |              |                        |                        |                                    |                         |            |            |            |                        |                       |              |
| 1                                | 24           | 63.1                   | 0.98                   | 20.4                               | 6.09                    | <i>bdl</i> | 2.95       | 2.59       | 0.98                   | 2.68                  | 100.0        |
| 24                               | 28           | 63.2                   | 0.92                   | 19.5                               | 6.45                    | <i>bdl</i> | 3.17       | 2.44       | 1.07                   | 2.85                  | 99.7         |
| 16                               | 23           | 63.5                   | 0.95                   | 19.3                               | 6.26                    | <i>bdl</i> | 2.84       | 2.61       | 1.20                   | 3.33                  | 100.0        |
| 2                                | 27           | 64.0                   | 0.96                   | 19.6                               | 6.32                    | <i>bdl</i> | 2.92       | 2.43       | 1.09                   | 2.89                  | 100.2        |
| 5                                | 20           | 64.0                   | 0.94                   | 19.7                               | 6.21                    | <i>bdl</i> | 2.93       | 2.57       | 1.10                   | 2.87                  | 100.4        |
| 11                               | 32           | 64.2                   | 0.94                   | 18.9                               | 6.01                    | <i>bdl</i> | 2.84       | 3.11       | 1.11                   | 3.11                  | 100.3        |
| 8                                | 21           | 64.4                   | 0.94                   | 19.7                               | 5.75                    | <i>bdl</i> | 2.83       | 2.68       | 1.02                   | 2.78                  | 100.2        |
| 14                               | 26           | 65.1                   | 0.94                   | 16.6                               | 6.50                    | <i>bdl</i> | 3.65       | 3.47       | 1.40                   | 2.34                  | 100.1        |
| 21                               | 29           | 67.3                   | 0.86                   | 15.9                               | 5.63                    | <i>bdl</i> | 2.98       | 2.85       | 1.45                   | 2.76                  | 99.8         |
| 4                                | 19           | 67.3                   | 0.88                   | 16.9                               | 5.44                    | <i>bdl</i> | 2.80       | 2.83       | 1.21                   | 2.68                  | 100.2        |
| 17                               | 30           | 68.6                   | 0.85                   | 15.2                               | 5.36                    | <i>bdl</i> | 2.74       | 2.94       | 1.42                   | 2.81                  | 100.0        |
| 10                               | 25           | 69.4                   | 0.81                   | 14.8                               | 5.01                    | <i>bdl</i> | 2.68       | 2.72       | 1.56                   | 2.82                  | 99.9         |
| 13                               | 22           | 71.6                   | 0.76                   | 13.0                               | 5.40                    | <i>bdl</i> | 3.20       | 2.15       | 1.32                   | 2.41                  | 100.0        |
| 12                               | 31           | 71.9                   | 0.75                   | 13.1                               | 5.25                    | <i>bdl</i> | 2.91       | 2.62       | 1.44                   | 2.46                  | 100.5        |
| 19                               | 33           | 72.9                   | 0.72                   | 12.5                               | 4.66                    | <i>bdl</i> | 2.94       | 2.08       | 1.73                   | 2.81                  | 100.4        |
| <b>lechatelierite inclusions</b> |              |                        |                        |                                    |                         |            |            |            |                        |                       |              |
| 13                               | 22           | 97.8                   | 0.10                   | 1.28                               | 0.77                    | <i>bdl</i> | 0.26       | 0.22       | 0.10                   | 0.43                  | 101.0        |
| 14                               | 26           | 100.2                  | <i>bdl</i>             | <i>bdl</i>                         | <i>bdl</i>              | <i>bdl</i> | <i>bdl</i> | <i>bdl</i> | <i>bdl</i>             | <i>bdl</i>            | 100.2        |
| <b>quartz inclusions</b>         |              |                        |                        |                                    |                         |            |            |            |                        |                       |              |
| 14                               | 26           | 100.6                  | <i>bdl</i>             | <i>bdl</i>                         | <i>bdl</i>              | <i>bdl</i> | <i>bdl</i> | <i>bdl</i> | <i>bdl</i>             | <i>bdl</i>            | 100.6        |
| 14                               | 26           | 100.2                  | <i>bdl</i>             | <i>bdl</i>                         | <i>bdl</i>              | <i>bdl</i> | <i>bdl</i> | <i>bdl</i> | <i>bdl</i>             | <i>bdl</i>            | 100.2        |
| <b>schlieren</b>                 |              |                        |                        |                                    |                         |            |            |            |                        |                       |              |
| 13                               | 22           | 54.4                   | 0.59                   | 18.1                               | 12.0                    | 0.16       | 6.69       | 6.24       | 0.83                   | 1.06                  | 100.3        |

<sup>^</sup>All Fe given as FeO.

**Fig. DR1.** Harker diagrams for Australasian microtektites from Core SO95-17957-2 (South China Sea) compared to Australasian microtektites from literature distinguished by chemical groups established by Glass et al. (2004).

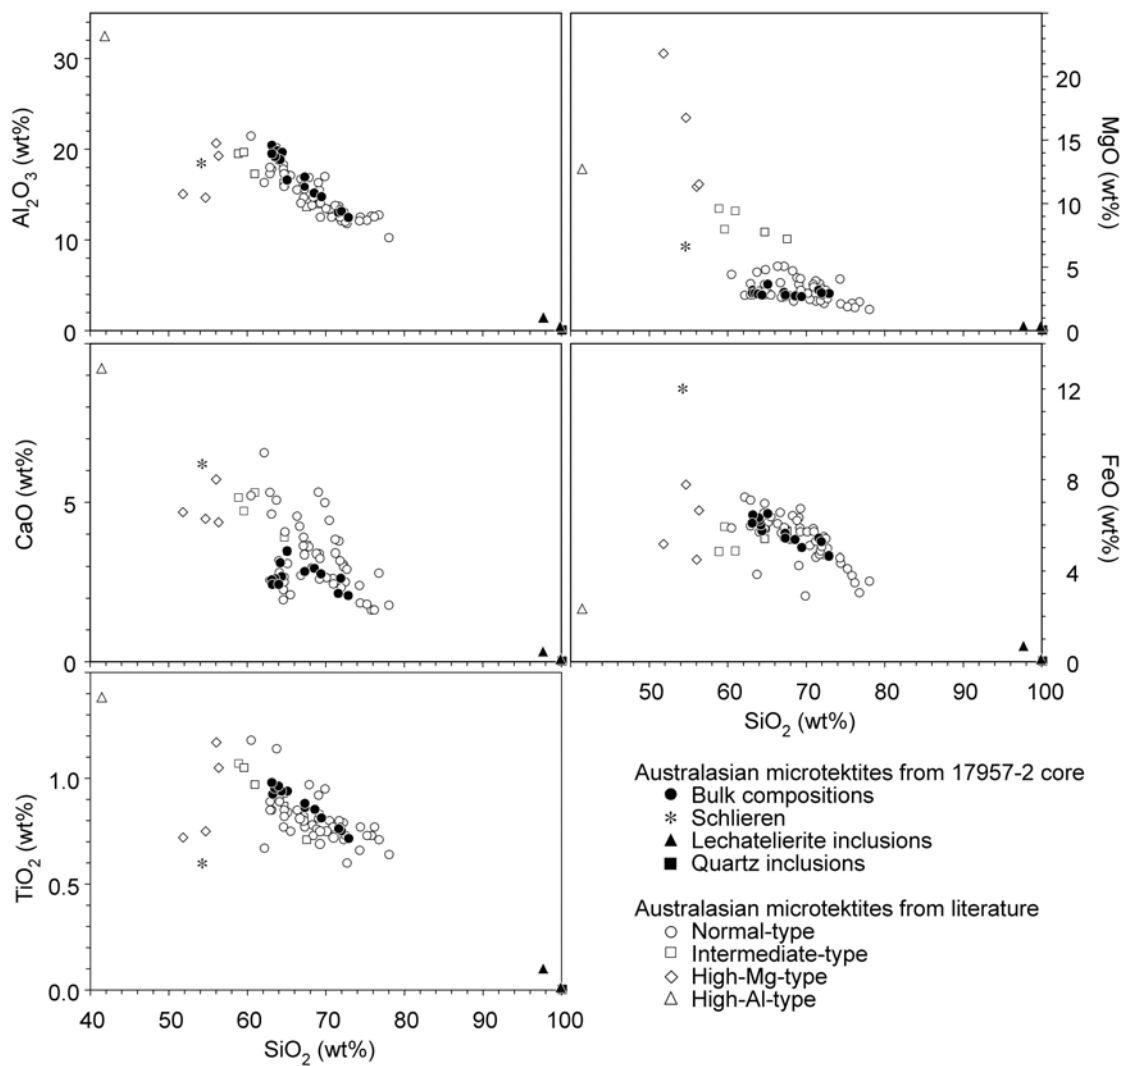

**Fig. DR2.** A further example of synchrotron X-ray diffraction pattern of an Australasian microtektite from Core SO95-17957-2 (microtektite #12) showing streaked diffraction maxima along fairly continuous diffraction rings resulting from shocked quartz crystals with moderate to strong mosaicism (white labels). The diffraction pattern also shows faint diffraction maxima at  $d = 4.05 \text{ \AA}$ , close to the strongest diffraction peak of cristobalite (PDF 39-1425), with  $d = 4.04 \text{ \AA}$  (black label).

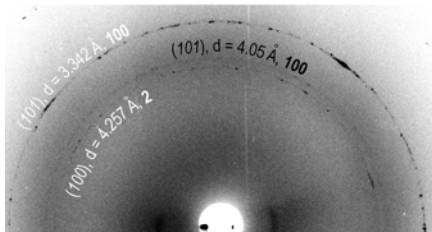

**Fig. DR3.** EDS spectra of the yet to be identified Zr-phase featured in Fig. 3E found in Australasian microtektite #8 from Core SO95-17957-2 (South China Sea).

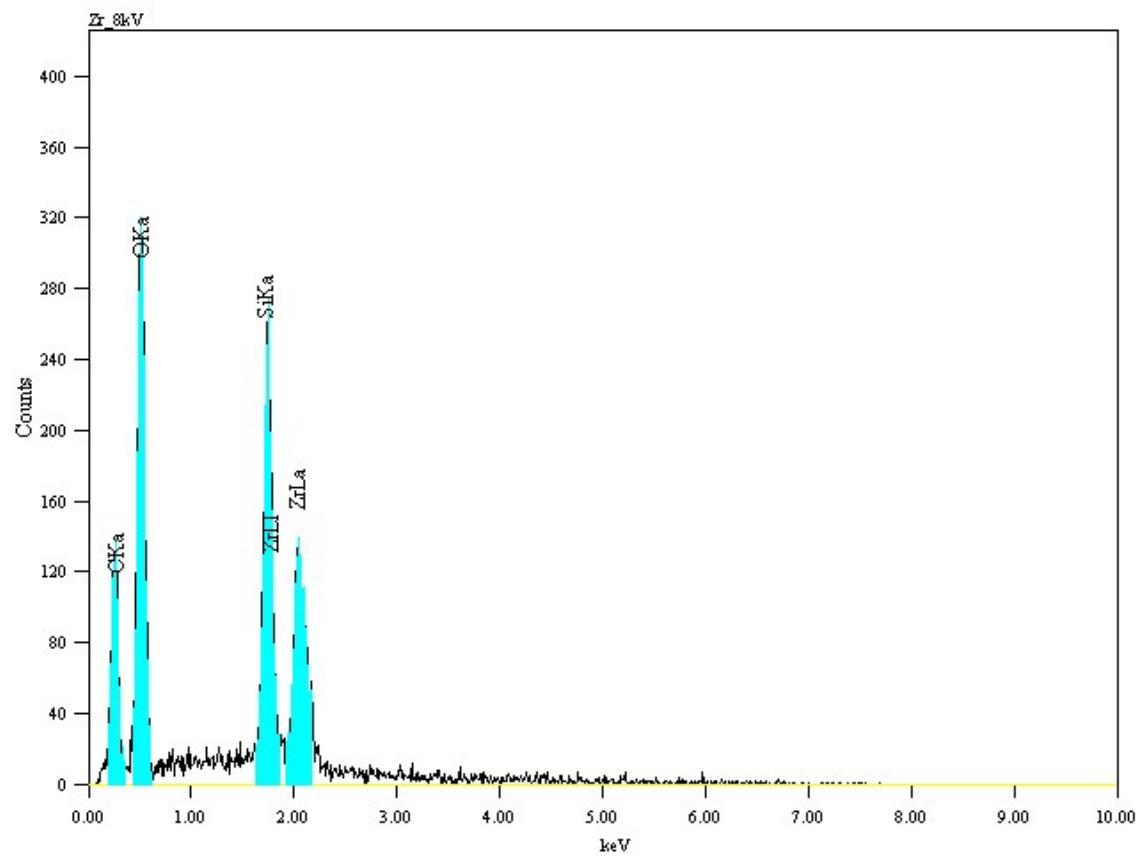

**Fig. DR4.** Micrograph of a sectioned Australasian microtektite from Hole ODP 769A core (Sulu Sea) showing abundant quartz inclusions. Quartz crystals are often associated with lechatelierite (silica glass), opaque crystallites and vesicles. Abbreviations: qtz = quartz; gl = glass; op = opaque; v = vesicles.

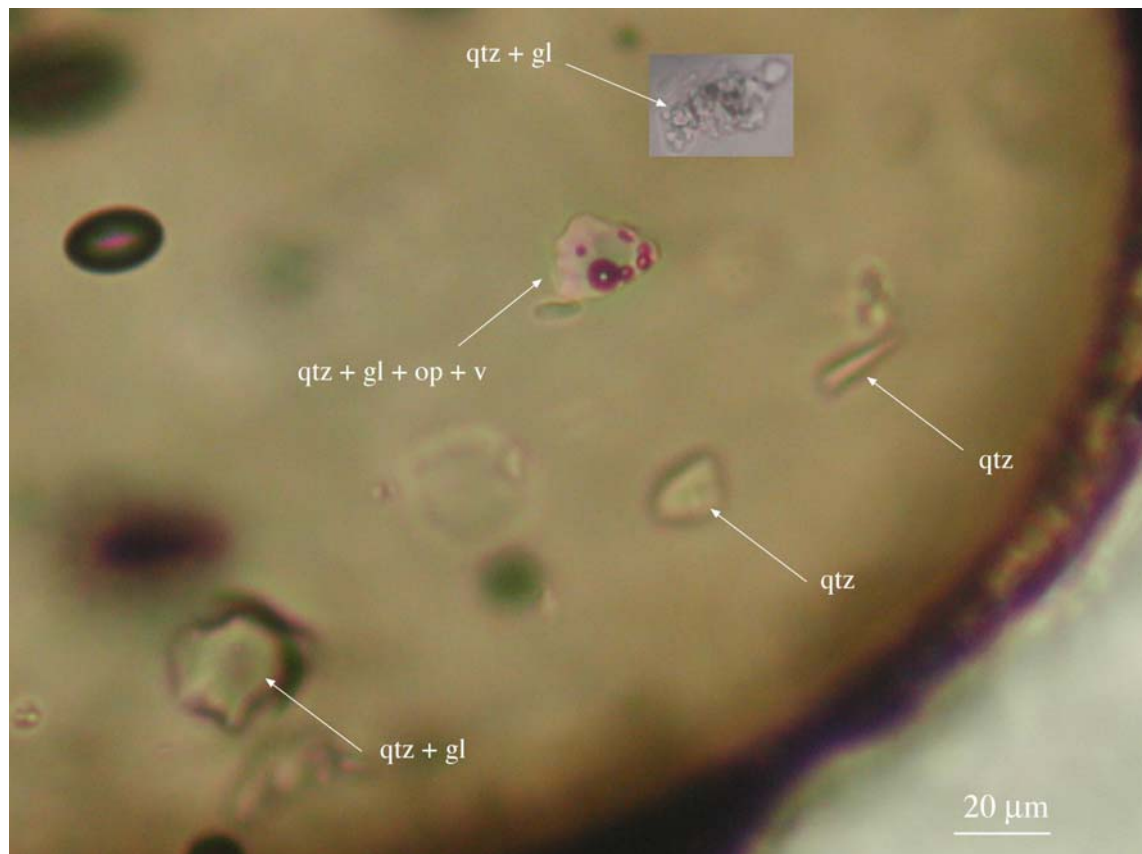

**Fig. DR5.** Raman spectrum of a  $\alpha$ -quartz grain found in the Australasian microtektite featured in Fig. DR3. The main wavelengths of  $\alpha$ -quartz are reported in black. Additional features include a shoulder at  $447\text{ cm}^{-1}$ , probably due to the presence of rutile, and a weak band at  $1000\text{ cm}^{-1}$ , attributed to silica-rich glass. The fluorescence of the spectrum is generated by the resin mount. Note the broadening and downshift of the A1 mode at  $465\text{ cm}^{-1}$  in the Raman spectra of the  $\alpha$ -quartz, which might be indicative of an increased spread of Si-O-Si angles caused by a progressive and important shock induced distortion of the structural configuration. Raman spectra and was acquired with a Jobin Yvon Labram microprobe, equipped with a Peltier-cooled CCD detector and a 514.5-nm argon-ion laser at the Earth Sciences department of Siena University. The measured laser power of the polarized 514.5-nm excitation line was 300–500 mW at the source and about 80% less at the sample surface. The slit width was  $100\text{ }\mu\text{m}$ , and the corresponding spectral resolution was  $1.5\text{ cm}^{-1}$ . Raman spectra were collected through a  $100\times$  Olympus objective (excitation spot 1–2  $\mu\text{m}$  in diameter) for a short acquisition time (30 or 60 s for each spectrum). Frequency Wavenumbers of the Raman lines were daily calibrated by the position of the diamond band at  $1,332\text{ cm}^{-1}$ .

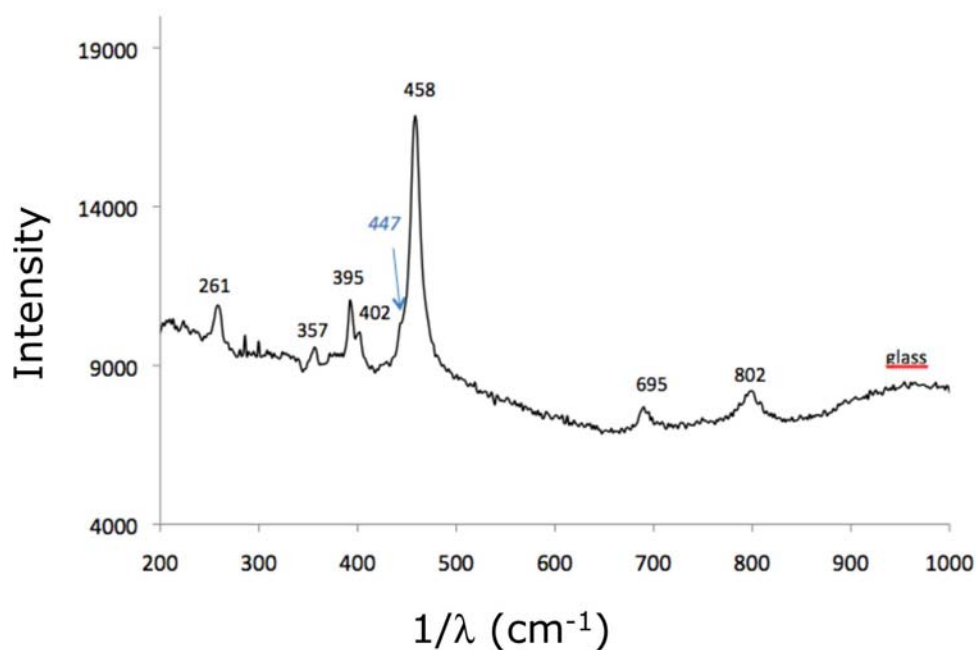

Supplement: Supplementary file 1 [file 22759487]
